# Supplementary material for: Coronary heart disease is associated with a worse clinical outcome of hand osteoarthritis: a cross-sectional and longitudinal study
Source: PubMed Central journal article supplement — RMD Open. 2017 Feb 15;3(1):e000344. doi: 10.1136/rmdopen-2016-000344 (PMC5318565; doi:10.1136/rmdopen-2016-000344), 2017-02-15
Supplement: rmdopen-2016-000344supp.pdf [file rmdopen-2016-000344supp.pdf]

**Supplementary file 1: Linear regression analysis with square-root transformation of factors associated with AUSCAN pain score on cross-sectional and multivariate analysis.**

|                                                                         | AUSCAN pain (n=778)    |                  |
|-------------------------------------------------------------------------|------------------------|------------------|
|                                                                         | $\beta$ (95% CI)       | P value          |
| <b>Age</b>                                                              | 0.01 (-0.04 to 0.01)   | 0.22             |
| <b>Sex</b>                                                              |                        |                  |
| Men                                                                     | Ref                    |                  |
| Premenopausal                                                           | 0.98 (0.38 to 1.56)    | <b>0.001</b>     |
| Postmenopausal                                                          | 0.91 (0.45 to 1.37)    | <b>&lt;0.001</b> |
| <b>BMI <math>\geq 30</math> vs <math>&lt;30</math> kg/m<sup>2</sup></b> |                        | NS               |
| <b>Medical history</b>                                                  |                        |                  |
| Coronary Heart Disease                                                  | 0.72 (0.039 to 1.40)   | <b>0.04</b>      |
| Depression                                                              | 0.93 (0.28 to 1.58)    | <b>&lt;0.001</b> |
| <b>Alcohol consumption</b>                                              |                        |                  |
| No                                                                      |                        |                  |
| Stopped                                                                 | 0.65 (-2.32 to 1.01)   | 0.44             |
| Yes                                                                     | -0.79 (-1.19 to -0.38) | <b>0.001</b>     |
| <b>Radiographic variables</b>                                           |                        |                  |
| Baseline KL hand score                                                  | 0.05 (0.03 to 0.06)    | <b>&lt;0.001</b> |

Adjustment on age and BMI. KL: Kellgren-Lawrence. NS: not significant. Significant results are in bold.

**Supplementary file 2: Logistic regression analysis of factors associated with presence of at least one erosive joint on cross-sectional and multivariate analysis.**

|                                                                          | At least one erosive joint |              |
|--------------------------------------------------------------------------|----------------------------|--------------|
|                                                                          | OR (95% CI)                | P value      |
| <b>Age</b>                                                               | 1.04 (1.00 to 1.07)        | <b>0.025</b> |
| <b>Sex</b>                                                               |                            |              |
| Men                                                                      | Ref                        |              |
| Premenopausal                                                            | 2.09 (0.92 to 4.7)         | <b>0.08</b>  |
| Postmenopausal                                                           | 2.13 (1.10 to 4.1)         | <b>0.02</b>  |
| <b>BMI <math>\geq 30</math> vs <math>&lt; 30</math> kg/m<sup>2</sup></b> | 1.38 (0.84 to 2.24)        | 0.195        |

Adjustment on age and BMI. Significant results are in bold.

**Supplementary file 3: Logistic regression analysis of factors associated with a new erosive joint on longitudinal and multivariate analysis.**

|                               | <b>Patients with a new erosive joint</b> |                  |
|-------------------------------|------------------------------------------|------------------|
|                               | <b>OR (95% CI)</b>                       | <b>P value</b>   |
| Age                           | 1.02 (0.96 to 1.08)                      | 0.5222           |
| <b>Baseline KL hand score</b> | 1.09 (1.06 to 1.14)                      | <b>&lt;0.001</b> |
| <b>Baseline AUSCAN score</b>  | 1.07 (1.02 to 1.14)                      | <b>0.006</b>     |

Significant results are in bold.
